# Supplementary material for: Greenhouse gas emissions limited by low nitrogen and carbon availability in natural, restored, and agricultural Oregon seasonal wetlands
Source: PeerJ. 2018 Aug 28;6:e5465. doi: 10.7717/peerj.5465 (PMC6118202; doi:10.7717/peerj.5465)
Supplement: Supplemental Information 2 — File includes the CO2 production, CH4 production, N2O production, denitrification rates, pH, % moisture, Initial and final nutrient availability, and the ration of N2O production to total denitrification from the laboratory incubations. This data is presented in Figs. 2–4. [file peerj-06-5465-s009.csv]

Treatment	Sample	Site (text)	CO2 production (�mol CO2/g dry soil /day)	Methane production (�mol CH4/g dry soil/ day)	Nitrous oxide production (�mol N2O/g dry soil/day)	Denitrification rate (�mol N2O/g dry soil/day)	pH	% Moisture	Initial Nitrate (micrograms N/ g dry soil)	Initial Ammonium (micrograms N/ g dry soil)	Final Nitrate Micrograms N/ g dry soil	Final Ammonium Micrograms N/ g dry soil	g dry soil	micrograms N added as Nitrate / gram dry soil	N20/Denitrification
Control	1	Agricultural Field	0.971178155	0	0.000147089	0.001053592	5.09	62.65393006	2.517114325	7.405467409	0	6.883561119	22.426315	0	0.139606883
Control	2	Agricultural Field	0.838410214	0	2.98815E-06	0.000452137	4.95	62.79642502	2.517114325	7.405467409	0.861077891	8.38791169	22.426315	0	0.006608957
Control	3	Agricultural Field	0.664558703	0	8.84354E-05	0.000388002	4.96	62.69121813	2.517114325	7.405467409	0.153499309	8.525115484	22.389	0	0.227924981
Control	4	Agricultural Field	0.986412736	0	0.0003459	0.000838362	4.99	62.72846896	2.517114325	7.405467409	0.133141995	6.511853958	22.396463	0	0.41259061
Control	5	Agricultural Field	1.026329318	0	0.000362623	0.000585271	5.03	62.78407733	2.517114325	7.405467409	0.232060984	6.595417441	22.426315	0	0.619580722
Salt	6	Agricultural Field	0.877830128	0	0.001592572	0.002139658	5.24	62.70990988	2.517114325	7.405467409	0.076741172	9.349632772	22.344222	0	0.74431156
Salt	7	Agricultural Field	0.893838815	0	0.001717238	0.002377146	5.19	62.77814778	2.517114325	7.405467409	0.323386299	9.738902778	22.366611	0	0.722395106
Salt	8	Agricultural Field	0.618175397	0	2.95181E-05	0.000315798	5.12	62.69743419	2.517114325	7.405467409	0	9.577899322	22.389	0	0.093471621
Salt	9	Agricultural Field	1.062056636	0	0.002588927	0.001495438	5.01	62.60437926	2.517114325	7.405467409	0.099347737	8.928877825	22.500945	0	1.731216953
Salt	10	Agricultural Field	1.023220608	0	0.002118438	0.000715613	5	62.64793212	2.517114325	7.405467409	0.076735833	9.886133135	22.560649	0	2.960313358
Nitrate	11	Agricultural Field	0.950474298	0	0.13752349	0.142239283	5.08	62.79642502	404.054326	7.405467409	256.5412591	12.31784087	22.426315	401.537212	0.966846056
Nitrate	12	Agricultural Field	1.190150212	0	0.15949691	0.143314368	5.05	62.72227772	404.7235547	7.405467409	296.8015993	11.63098537	22.389	402.2064407	1.112916398
Nitrate	13	Agricultural Field	1.05872987	0	0.088629822	0.135389711	4.94	62.62297374	402.98818	7.405467409	329.1524489	12.02115613	22.486019	400.471066	0.654627452
Nitrate	14	Agricultural Field	1.220114351	0	0.130755975	0.125994604	4.96	62.67880869	402.8553097	7.405467409	424.6012845	12.27940997	22.493482	400.3381957	1.037790283
Nitrate	15	Agricultural Field	0.839381363	0	0.107969144	0.151638554	4.92	62.72851241	404.9918712	7.405467409	313.6593664	11.7883698	22.374074	402.4747572	0.712016445
Carbon	16	Agricultural Field	0.900192983	3.40497E-05	0	0.001215624	5.15	62.70981051	2.517114325	7.405467409	0.010094117	3.058517513	22.433778	0	0
Carbon	17	Agricultural Field	3.529284189	7.43272E-05	0.000108932	0.000334105	5.11	62.72221576	2.517114325	7.405467409	0.036580403	3.658040282	22.426315	0	0.326039812
Carbon	18	Agricultural Field	3.301609171	0	6.30512E-05	6.75868E-05	5.11	62.685	2.517114325	7.405467409	1.085781408	3.586738583	22.418852	0	0.932892439
Carbon	19	Agricultural Field	3.245832919	0.000130809	4.97271E-05	0.00033987	5.09	62.64770986	2.517114325	7.405467409	0.448759034	3.486512497	22.426315	0	0.146312339
Carbon	20	Agricultural Field	0.850326566	0	0	0.000300562	5.04	62.55480977	2.517114325	7.405467409			22.53826	0	0
pH	21	Agricultural Field	5.165096991	0	5.45247E-05	0.000375225	7.33	62.72852691	2.517114325	7.405467409	0.163551116	15.99296266	22.366611	0	0.145312135
pH	22	Agricultural Field	3.258055543	0	4.49582E-05	0.000165163	7.06	62.70979402	2.517114325	7.405467409	0.194544998	14.3276669	22.448704	0	0.272205032
pH	23	Agricultural Field	4.113871429	0.000221654	6.32483E-05	0.000435367	7.11	62.72225291	2.517114325	7.405467409	0.068104626	12.19072806	22.403926	0	0.145275654
pH	24	Agricultural Field	1.985269346	0.000299096	5.83859E-05	0.004306139	7.08	63.09073147	2.517114325	7.405467409	0.176696515	12.15419601	22.403926	0	0.013558762
pH	25	Agricultural Field	4.413071324	0.000229309	4.85676E-05	0.000433995	7.24	62.76559395	2.517114325	7.405467409	7.479841691	12.22990193	22.411389	0	0.111908126
CxN	26	Agricultural Field	4.049233253	0.000221276	2.064146811	2.908078015	5.17	62.7345058	403.2541854	7.405467409	134.0181109	6.649753595	22.471093	400.7370714	0.709797605
CxN	27	Agricultural Field	3.859787267	0.000189569	2.170455527	3.61728822	5.25	62.82127656	404.5895305	7.405467409	117.57877	10.64061267	22.396463	402.0724165	0.600022833
CxN	28	Agricultural Field	4.006912831	0.000233604	1.602464969	3.474455153	5.06	62.64767256	404.4555957	7.405467409	164.3874421	7.331565363	22.403926	401.9384817	0.461213312
CxN	29	Agricultural Field	4.542531087	0.000250028	1.968408363	3.5057108	5	62.70364197	404.5895305	7.405467409	132.3229692	7.197642183	22.396463	402.0724165	0.561486236
CxN	30	Agricultural Field	1.438071272	0.000210564	2.262516721	5.398202775	5.14	62.6539404	403.9207474	7.405467409	123.9068774	7.251004874	22.433778	401.4036334	0.419124071
CxpH	31	Agricultural Field	12.56600024	0.000263751	0.000342972	0.010990316	7.26	62.67256995	2.517114325	7.405467409	0	4.595964826	22.411389	0	0.031206777
CxpH	32	Agricultural Field	9.540210346	0.000272475	0.000576336	0.002051864	7.05	62.62282906	2.517114325	7.405467409	0	3.091697672	22.433778	0	0.280884244
CxpH	33	Agricultural Field	9.561554902	0.000336066	0.000538906	0.000813788	7.07	62.74706753	2.517114325	7.405467409	0.394033385	2.782860782	22.396463	0	0.662219242
CxpH	34	Agricultural Field	8.696499681	0.000279389	0.000234106	0.000743775	6.96	62.77154904	2.517114325	7.405467409	0.504397655	4.095228581	22.471093	0	0.314753969
CxpH	35	Agricultural Field	8.961898898	0.000342546	0.000303961	0.000322212	7	62.74083292	2.517114325	7.405467409	0	3.065559228	22.411389	0	0.943356965
NxpH	36	Agricultural Field	1.117986771	0.000398616	0.053682598	0.284883239	7.2	62.61664613	403.6538567	7.405467409	206.3144816	21.65523878	22.448704	401.1367427	0.188437194
NxpH	37	Agricultural Field	4.904733364	0.000288483	0.136377399	0.217689174	7.28	62.66638903	403.5205444	7.405467409	241.1691143	16.81187144	22.456167	401.0034304	0.626477638
NxpH	38	Agricultural Field	2.765894409	0.0003011	0.16291828	0.248630225	6.92	62.66016473	403.7872577	7.405467409	206.5160099	16.82147951	22.441241	401.2701437	0.655263373
NxpH	39	Agricultural Field	1.314258096	0.000268244	0.108849804	0.274611586	7.35	62.61064264	402.4572274	7.405467409	230.3142102	16.1467116	22.515871	399.9401134	0.39637732
NxpH	40	Agricultural Field	5.429113431	0	0.178120807	0.414231947	7.23	62.647685	404.32175	7.405467409	205.229623	25.66443216	22.411389	401.804636	0.430002582
CxNxpH	41	Agricultural Field	0.712057779	0	0	0.015661839	7.33	62.67257823	404.054326	7.405467409	0.215597264	20.03856795	22.426315	401.537212	0
CxNxpH	42	Agricultural Field	7.019775753	0	0.005694344	0.393471146	6.96	62.66633939	404.5895305	7.405467409	0.143296804	20.17178084	22.396463	402.0724165	0.014472075
CxNxpH	43	Agricultural Field	1.661361491	0.00011007	0.381491592	0.156213716	7.45	62.64772228	403.9207474	7.405467409	0.190323192	21.87447891	22.433778	401.4036334	2.442113285
CxNxpH	44	Agricultural Field	9.092655795	8.92866E-05	0.119354781	0.216233355	6.97	62.7409259	404.9918712	7.405467409	1.252491314	20.58942353	22.374074	402.4747572	0.551972109
CxNxpH	45	Agricultural Field	7.128549553	6.81746E-05	0	0.000975912	6.92	62.56119443	401.5314401	7.405467409	2.202646524	21.46947417	22.568112	399.0143261	0
Control	46	Restoration	0.357546316	0	3.4206E-05	0.000168025	5.04	62.75179675	0.302520202	1.493167411	0	8.093496139	22.430868	0	0.2035765
Control	47	Restoration	0.379379044	0	2.5741E-05	0.000547258	5.01	62.65258397	0.302520202	1.493167411	0	2.790646431	22.460736	0	0.047036368
Control	48	Restoration	0.342146878	1.40609E-05	2.76295E-05	8.14366E-05	5	62.665	0.302520202	1.493167411	0.078298227	4.737042744	22.401	0	0.339275815
Control	49	Restoration	0.588874396	0	3.74673E-05	7.65574E-05	4.96	62.65255915	0.302520202	1.493167411	0.077237297	4.413559834	22.415934	0	0.489400805
Control	50	Restoration	0.652630272	5.94374E-05	3.30307E-05	8.53958E-05	4.94	62.73974474	0.302520202	1.493167411	0.077311828	3.688878638	22.333797	0	0.38679494
Salt	51	Restoration	0.642206976	0	0.000447688	0.000513179	5.09	62.69609695	0.302520202	1.493167411	0.090107047	4.133660772	22.393533	0	0.872382946
Salt	52	Restoration	0.444156575	0.000101396	0.000193545	0.000252042	5.01	62.65257157	0.302520202	1.493167411	0	3.596369951	22.438335	0	0.767907194
Salt	53	Restoration	0.549249628	0	0.000109182	0.000101328	5.07	62.72737053	0.302520202	1.493167411	0.088664889	5.142563573	22.311396	0	1.077510315
Salt	54	Restoration	0.903470232	0	0.000600985	0.000242022	5.03	62.77101219	0.302520202	1.493167411	0.088795998	3.973620907	22.288995	0	2.4831819
Salt	55	Restoration	0.767609415	0	4.7417E-05	0.00018078	5.02	62.72099317	0.302520202	1.493167411	0.086068713	4.755296408	22.371132	0	0.262290985
Nitrate	56	Restoration	0.894363394	0	0.188742467	0.238101036	5.03	62.80125912	401.8919132	1.493167411	234.1912933	6.479601	22.423401	401.5893932	0.792699058
Nitrate	57	Restoration	0.638888678	4.28446E-05	0.091984017	0.12806622	5.1	62.72708015	402.0256871	1.493167411	237.1529961	4.953070093	22.415934	401.7231671	0.718253544
Nitrate	58	Restoration	1.079531858	0.000199899	0.12315541	0.170047657	5.12	62.65878268	401.8919132	1.493167411	243.9377817	5.741891596	22.423401	401.5893932	0.724240561
Nitrate	59	Restoration	0.960297596	0.000192489	0.16681126	0.238131354	5.11	62.68991491	402.964606	1.493167411	262.3653575	6.28420018	22.363665	402.662086	0.700501034
Nitrate	60	Restoration	0.987837972	0	0.132286489	0.190532487	5.11	62.70231013	402.4275442	1.493167411	287.7482292	6.873879397	22.393533	402.1250242	0.694298865
Control	61	Restoration	3.627479289	0.001955275	0.000581589	0.001058249	5.07	62.72093724	0.302520202	1.493167411	0	1.730512212	22.393533	0	0.54957679
Control	62	Restoration	3.140642327	0.001952366	6.70844E-05	0.000248257	5.01	62.69609695	0.302520202	1.493167411	0	1.98541692	22.393533	0	0.270221085
Control	63	Restoration	3.676092627	0.002104534	0	0.000131828	5	62.65877646	0.302520202	1.493167411	1.050862897	1.401150529	22.401	0	0
Control	64	Restoration	2.956776363	0.002181619	3.51792E-05	0.000142791	5.01	62.68365196	0.302520202	1.493167411	2.357649356	1.624866448	22.408467	0	0.246368621
Control	65	Restoration	2.414214974	0.002020581	2.18011E-05	0.000124867	5	62.68989	0.302520202	1.493167411	0.784190713	2.396751897	22.386066	0	0.17459465
pH	66	Restoration	3.166382941	0.002162302	0	0.000142676	7.05	62.62773952	0.302520202	1.493167411	1.216930725	6.033337271	22.468203	0	0
pH	67	Restoration	3.005687089	0.002165559	2.69577E-06	0.0001463	7.02	62.64632939	0.302520202	1.493167411	0.740811671	4.233209548	22.408467	0	0.018426275
pH	68	Restoration	3.575715427	0.002000704	1.59102E-05	9.38466E-05	7.15	62.62767744	0.302520202	1.493167411	0	5.713145421	22.430868	0	0.169534507
pH	69	Restoration	2.883447479	0.002076922	0	0.000169764	6.96	62.62767744	0.302520202	1.493167411	0.181613821	6.441236868	22.430868	0	0
pH	70	Restoration	2.898672723	0.001909089	2.63425E-05	0.00018963	7.03	62.4634533	0.302520202	1.493167411	0.200083167	5.691254537	22.946091	0	0.138914905
CxN	71	Restoration	4.068724599	0.001671813	1.28948333	2.182510612	5.12	62.44840378	397.7886596	1.493167411	103.7341953	1.966525029	22.654878	397.4861396	0.590825686
CxN	72	Restoration	3.721566557	0.00212814	1.709008472	1.497713693	5.04	61.96264027	387.5770697	1.493167411	144.7395889	3.31211874	23.252238	387.2745497	1.141078218
CxN	73	Restoration	3.039288459	0.001420096	1.298759126	2.04013601	5.04	62.45462711	397.7886596	1.493167411	165.6989549	4.106762892	22.654878	397.4861396	0.636604187
CxN	74	Restoration	3.326019846	0.001965448	1.377399449	2.418283666	5.08	62.41783019	396.8736965	1.493167411	134.6436286	4.554926543	22.707147	396.5711765	0.569577287
CxN	75	Restoration	3.23115276	0.001827759	1.630482229	1.819832963	5.1	62.36878843	395.8331686	1.493167411	137.4400732	4.45856373	22.766883	395.5306486	0.895951586
CxpH	76	Restoration	9.550134352	0.000693009	0.00301855	0.007851009	7.17	61.97733007	0.302520202	1.493167411	0	1.079454011	23.326908	0	0.384479268
CxpH	77	Restoration	9.207845465	0.000724761	0.000699553	0.001650307	7.11	61.87323002	0.302520202	1.493167411	0	1.252581168	23.37171	0	0.423892932
CxpH	78	Restoration	7.58137292	0.00060542	0.000533028	0.000848704	7.1	62.67742843	0.302520202	1.493167411	0	1.224953978	22.423401	0	0.628049789
CxpH	79	Restoration	12.24807071	0.000744826	0.000292371	0.000553416	7.24	61.04173913	0.302520202	1.493167411	1.523527207	1.844815258	24.461892	0	0.528303137
CxpH	80	Restoration	10.99186733	0.000920237	0	0.000602003	7.17	62.18728839	0.302520202	1.493167411	0.234451534	1.228526036	23.050629	0	0
NxpH	81	Restoration	3.561629096	0.000803499	0.023383018	0.121159646	7.25	62.50476395	396.7433312	1.493167411	243.0989242	11.08594443	22.714614	396.4408112	0.192993449
NxpH	82	Restoration	4.883271664	0.000801417	0.084835819	0.171395951	7.45	62.39942432	396.4828576	1.493167411	267.1858417	8.367801307	22.729548	396.1803376	0.494969796
NxpH	83	Restoration	1.299429616	0.000936046	0.014297931	0.107065005	7.06	62.39977532	395.9629359	1.493167411	239.8764731	7.720575106	22.759416	395.6604159	0.13354439
NxpH	84	Restoration	2.458859265	0.000868474	0.054628961	0.14531554	7.08	62.58430923	400.4262584	1.493167411	295.501968	13.52328116	22.505538	400.1237384	0.375933372
NxpH	85	Restoration	5.30541912	0.000881819	0.129344282	0.278257957	7.48	62.65271875	396.8736965	1.493167411	350.095447	12.21263187	22.707147	396.5711765	0.464835879
CxNxpH	86	Restoration	12.03726357	0.000851423	0.713617685	0.172986732	7.19	61.49413191	378.350466	1.493167411	0.937906685	15.1983515	23.81973	378.047946
CxNxpH	87	Restoration	10.06042184	0.000881092	0.360303496	0.24371378	7.14	62.83382348	406.0807662	1.493167411	1.328017329	12.76141652	22.191924	405.7782462	1.478387865
CxNxpH	88	Restoration	15.14476316	0.000861108	0.31018904	0.376162329	7.37	62.87558228	402.6958959	1.493167411	1.234920307	16.6054818	22.378599	402.3933759	0.824614844
CxNxpH	89	Restoration	0.787791654	0	1.294064977	0.828573642	7.16	62.51003155	399.1030979	1.493167411	4.035435339	13.74600845	22.580208	398.8005779	1.561798385
CxNxpH	90	Restoration	15.2169864	0	0.293862202	1.113468529	7.39	62.69609695	402.4275442	1.493167411	6.346440147	14.2189327	22.393533	402.1250242	0.263916037
Water	91	Reference	0.917355829	0	0	0.000200295	5.62	61.24793614	0.336578264	5.281169193	0	6.946028302	23.301616	0	0
Water	92	Reference	1.060753295	0	0	0.000201662	5.58	61.4211317	0.336578264	5.281169193	0.085925722	4.88702546	23.317068	0	0
Water	93	Reference	1.042397029	0	0.000142803	0.000208708	5.79	61.11408745	0.336578264	5.281169193	0.106168021	4.824746716	23.479314	0	0.68422186
Water	94	Reference	1.189313266	0	6.81538E-05	0.000202179	5.49	61.17850958	0.336578264	5.281169193	0.089726312	4.609689256	23.494766	0	0.337096017
Water	95	Reference	1.116601283	0	0.000303095	0.000216724	5.49	61.24830045	0.336578264	5.281169193	0.103836607	4.811096137	23.37115	0	1.398533621
Salt	96	Reference	0.792605203	0	0.000490169	0.000241337	5.54	61.21594217	0.336578264	5.281169193	0.093054279	7.269865584	23.340246	0	2.031059727
Salt	97	Reference	0.687984903	0	0	0.000161596	5.7	61.38277025	0.336578264	5.281169193	0.023155151	8.787379739	23.363424	0	0
Salt	98	Reference	0.90419441	0	0.001000065	0.000824966	5.58	61.24809832	0.336578264	5.281169193	0.118372409	7.031321107	23.33252	0	1.21225023
Salt	99	Reference	1.032948521	7.27963E-05	0.000902658	0.000480013	5.63	61.267363	0.336578264	5.281169193	0.142553485	7.650370369	23.324794	0	1.880488066
Salt	100	Reference	0.969715828	0	0.001248846	0.000169715	5.45	61.37643512	0.336578264	5.281169193	0.117508001	7.814282086	23.185726	0	7.358488807
Nitrate	101	Reference	1.147125356	0.000267888	0.183632331	0.18189629	5.66	61.2415758	386.5343624	5.281169193	213.3191387	14.25542955	23.317068	386.1977844	1.009544127
Nitrate	102	Reference	1.10655195	0.000204725	0.233299709	0.226062292	5.58	61.41464421	385.6406816	5.281169193	269.032998	15.78770753	23.37115	385.3041036	1.032015148
Nitrate	103	Reference	1.087253684	9.2621E-05	0.209424423	0.189831374	5.59	61.59373821	388.3342189	5.281169193	265.2097291	10.1749921	23.208904	387.9976409	1.103212912
Nitrate	104	Reference	1.183745552	0.0001524	0.192749909	0.207406341	5.62	61.3316004	386.1508492	5.281169193	298.057492	9.901252376	23.340246	385.8142712	0.929334695
Nitrate	105	Reference	0.878471236	2.62584E-05	0.144598272	0.179170812	5.45	61.35081609	386.0231807	5.281169193	154.0887751	9.696835401	23.347972	385.6866027	0.807041448
Carbon	106	Reference	2.991542475	0	0.000176201	0.002711193	5.5	61.19682882	0.336578264	5.281169193	0.011539294	3.323316625	23.37115	0	0.064990344
Carbon	107	Reference	2.336903729	0.000124925	9.44151E-05	0.000367664	5.45	61.6637157	0.336578264	5.281169193	0	3.583742919	23.193452	0	0.256797659
Carbon	108	Reference	2.792783365	0.000116986	5.97092E-05	0.000245777	5.41	61.54872439	0.336578264	5.281169193	1.634611504	3.906837425	23.270712	0	0.242940524
Carbon	109	Reference	3.594054443	9.76334E-05	7.34334E-06	0.000145438	5.36	61.03287008	0.336578264	5.281169193	2.550875573	3.69357549	23.664738	0	0.050491167
Carbon	110	Reference	3.717869865	0	0	0.000144552	5.36	61.44697775	0.336578264	5.281169193	2.989000638	3.934886916	23.21663	0	0
pH	111	Reference	1.127183541	0	0	0.000512769	7.43	61.20986901	0.336578264	5.281169193	0.902291359	13.81560405	23.394328	0	0
pH	112	Reference	3.933904044	0	2.47679E-05	0.000173868	7.17	60.97568653	0.336578264	5.281169193	1.96405167	7.085045287	23.703368	0	0.142452378
pH	113	Reference	4.325713814	0	0	0.000153558	7.36	61.24178891	0.336578264	5.281169193	0	7.443031396	23.355698	0	0
pH	114	Reference	5.761384475	0	7.56614E-05	9.89331E-05	7.49	61.31895276	0.336578264	5.281169193	0.152302978	12.7817345	23.417506	0	0.764772841
pH	115	Reference	2.035082573	0	0	0.000171183	7.05	61.1967713	0.336578264	5.281169193	0.101002933	5.481704632	23.363424	0	0
CxN	116	Reference	3.504155363	0	1.587915488	2.659523014	5.61	61.31221871	387.1752482	5.281169193	123.8877242	20.25263237	23.278438	386.8386702	0.597067775
CxN	117	Reference	1.146035241	0	1.534517688	2.024362111	5.56	61.33172721	384.8779549	5.281169193	140.0289144	10.00206531	23.417506	384.5413769	0.758025296
CxN	118	Reference	3.400776472	0	2.47048203	3.310424639	5.49	61.38929892	388.7220873	5.281169193	56.34550804	25.93682116	23.185726	388.3855093	0.746273454
CxN	119	Reference	3.632289817	0	1.724898492	2.309406074	5.63	62.78880834	388.4634222	5.281169193	115.1378754	11.51378754	23.201178	388.1268442	0.74690134
CxN	120	Reference	3.611307111	0	1.645530758	2.347240417	5.64	61.23571263	384.8779549	5.281169193	129.7308275	20.38355145	23.417506	384.5413769	0.70104909
CxpH	121	Reference	4.708808696	0	0.004112074	0.008838997	7.4	61.08262192	0.336578264	5.281169193	0.082256814	2.855486527	23.541122	0	0.465219552
CxpH	122	Reference	10.56036369	0.000178818	0.001128794	0.001596456	7.24	61.36363067	0.336578264	5.281169193	0.044055062	3.590487581	23.432958	0	0.707062307
CxpH	123	Reference	0.24403041	0.00058957	0.000396362	0.001005759	7.15	61.47820728	0.336578264	5.281169193	0.034357939	5.176596172	23.378876	0	0.394092514
CxpH	124	Reference	18.45096163	0.000183928	0.000279885	0.000729108	7.55	61.14618772	0.336578264	5.281169193	0.17011322	2.580050506	23.471588	0	0.383872726
CxpH	125	Reference	12.85449346	6.69721E-05	0.000237699	0.000555216	7.42	61.33140859	0.336578264	5.281169193	0.549980425	3.475408216	23.224356	0	0.42812101
NxpH	126	Reference	1.91710066	0	0.144475975	0.363664521	7.14	61.39570193	388.3342189	5.281169193	187.1845335	38.48111795	23.208904	387.9976409	0.397278169
NxpH	127	Reference	2.723750184	0	0.019986542	0.433417794	7.03	61.2352218	386.2786023	5.281169193	252.757135	32.87205327	23.33252	385.9420243	0.046113802
NxpH	128	Reference	3.142008201	0	0.19330323	0.433919055	6.99	61.31856192	387.8182646	5.281169193	224.4468702	30.83574819	23.239808	387.4816866	0.445482235
NxpH	129	Reference	0.320486505	0	0.3408471	0.85698703	7.52	61.10173611	383.1099485	5.281169193	170.8319501	35.62027895	23.52567	382.7733705	0.397727257
NxpH	130	Reference	2.262376941	0	0.081437732	0.289846853	6.96	61.25434132	386.9186388	5.281169193	251.3039465	30.50617855	23.29389	386.5820608	0.280968142
CxNxpH	131	Reference	13.96168712	8.00833E-05	1.86262495	4.071265916	7.34	61.42114863	386.6623696	5.281169193	0.796679152	23.48471587	23.309342	386.3257916	0.457505107
CxNxpH	132	Reference					7.11	61.32496919	388.0760701	5.281169193	0.34888798	28.60881436	23.224356	387.7394921
CxNxpH	133	Reference	12.91756562	1.06519E-05	4.164406911	6.625982247	7.32	61.65747313	388.7220873	5.281169193	0.431935909	25.68167504	23.185726	388.3855093	0.628496539
CxNxpH	134	Reference	0.652741706	3.40135E-05	2.483856475	4.283367825	7.1	61.37	388.7220873	5.281169193	0.67429211	27.29720471	23.185726	388.3855093	0.579884002
CxNxpH	135	Reference	17.26536054	0	2.390520566	6.014331766	7.47	61.38929892	388.7220873	5.281169193	7.951972935	21.15467609	23.185726	388.3855093	0.397470685
