# Supplementary material for: Greenhouse gas emissions limited by low nitrogen and carbon availability in natural, restored, and agricultural Oregon seasonal wetlands
Source: PeerJ journal article supplement (doi:10.7717/peerj.5465), 2018-08-28
Supplement: Table_S3.pdf [file Table_S3.pdf]

**Table S3.** Mean  $\pm$  SE soil moisture, soil temperature at a 5 cm depth, and pH averaged across restoration treatment and agricultural field (n = 55) for the four sampling seasons. Lower case letter differences indicate significant ( $p < 0.05$ ) differences among seasons. Also reported is the conversion of % moisture to water filled pore space (WFPS) based on an average bulk density of 1.16 g cm<sup>-3</sup> and an assumed particle density of 2.65 g cm<sup>-3</sup>.

| <b>Season</b> | <b>% Moisture</b> | <b>WFPS</b> | <b>Soil<br/>Temperature<br/>(°C)</b> | <b>pH</b>        |
|---------------|-------------------|-------------|--------------------------------------|------------------|
| Fall 2005     | 20.0 $\pm$ 0.2c   | 41.3%       | 14.4 $\pm$ 0.24b                     | 4.93 $\pm$ 0.02b |
| Winter 2006   | 36.8 $\pm$ 0.5a   | 76.0%       | 8.8 $\pm$ 0.68d                      | 5.09 $\pm$ 0.04a |
| Spring 2006   | 31.4 $\pm$ 0.4b   | 64.8%       | 11.3 $\pm$ 0.24c                     | 5.15 $\pm$ 0.02a |
| Summer 2006   | 13.1 $\pm$ 0.3d   | 27.0%       | 17.5 $\pm$ 0.07a                     | 4.99 $\pm$ 0.01b |
